# Supplementary material for: Viral Communities in the Global Deep Ocean Conveyor Belt Assessed by Targeted Viromics
Source: Front Microbiol. 2019 Aug 21;10:1801. doi: 10.3389/fmicb.2019.01801 (PMC6712177; doi:10.3389/fmicb.2019.01801)
Supplement: TABLE S3 — Clustering of the viral contigs against selected viral references based on the OPTSIL algorithm. [file Table_3.xls]

## Sheet: Legend
Contigs	Sequence_ID
ANAD_12	seq_bw		ANAD=North Atlantic Ocean
ANAD_132	seq_cb		BEQ=Atlantic Equator
ANAD_133	seq_cc		CSAD=South_Atlantic Ocean
ANAD_134	seq_cd		DSP=South Pacific Ocean
ANAD_135	seq_ce		EMP=Pacific Equator
ANAD_136	seq_cf		FNP=North Pacific
ANAD_137	seq_cg
ANAD_26	seq_bx_50
ANAD_32	seq_by
ANAD_34	seq_bz
ANAD_37	seq_ca
BEQ_11	seq_af
BEQ_155	seq_bn_40
BEQ_156	seq_bo
BEQ_157	seq_bp
BEQ_158	seq_bq
BEQ_159	seq_br
BEQ_160	seq_bs
BEQ_161	seq_bt
BEQ_162	seq_bu
BEQ_163	seq_bv
BEQ_2	seq_aa_1
BEQ_23	seq_ag
BEQ_25	seq_ah
BEQ_26	seq_ai
BEQ_28	seq_aj
BEQ_29	seq_ak
BEQ_3	seq_ab
BEQ_30	seq_al
BEQ_32	seq_am
BEQ_33	seq_an
BEQ_35	seq_ao
BEQ_36	seq_ap
BEQ_37	seq_aq
BEQ_38	seq_ar
BEQ_39	seq_as
BEQ_40	seq_at_20
BEQ_41	seq_au
BEQ_42	seq_av
BEQ_44	seq_aw
BEQ_5	seq_ac
BEQ_51	seq_ax
BEQ_54	seq_ay
BEQ_56	seq_az
BEQ_57	seq_ba
BEQ_58	seq_bb
BEQ_59	seq_bc
BEQ_6	seq_ad
BEQ_61	seq_bd
BEQ_63	seq_be
BEQ_64	seq_bf
BEQ_65	seq_bg
BEQ_68	seq_bh
BEQ_69	seq_bi
BEQ_7	seq_ae
BEQ_70	seq_bj
BEQ_74	seq_bk
BEQ_77	seq_bl
BEQ_78	seq_bm
CSAD_10	seq_qu
CSAD_100	seq_sy
CSAD_102	seq_sz
CSAD_105	seq_ta
CSAD_106	seq_tb
CSAD_108	seq_tc
CSAD_109	seq_td
CSAD_11	seq_qv
CSAD_113	seq_te
CSAD_115	seq_tf_500
CSAD_116	seq_tg
CSAD_117	seq_th
CSAD_118	seq_ti
CSAD_119	seq_tj
CSAD_12	seq_qw
CSAD_120	seq_tk
CSAD_122	seq_tl
CSAD_124	seq_tm
CSAD_125	seq_tn
CSAD_126	seq_to
CSAD_127	seq_tp
CSAD_128	seq_tq
CSAD_13	seq_qx_440
CSAD_130	seq_tr
CSAD_131	seq_ts
CSAD_132	seq_tt
CSAD_133	seq_tu
CSAD_134	seq_tv
CSAD_135	seq_tw
CSAD_137	seq_tx
CSAD_138	seq_ty
CSAD_139	seq_tz_520
CSAD_141	seq_ua
CSAD_143	seq_ub
CSAD_144	seq_uc
CSAD_145	seq_ud
CSAD_147	seq_ue
CSAD_150	seq_uf
CSAD_151	seq_ug
CSAD_154	seq_uh
CSAD_156	seq_ui
CSAD_158	seq_uj
CSAD_159	seq_uk
CSAD_160	seq_ul
CSAD_161	seq_um
CSAD_162	seq_un
CSAD_163	seq_uo
CSAD_164	seq_up
CSAD_165	seq_uq
CSAD_166	seq_ur
CSAD_167	seq_us
CSAD_168	seq_ut_540
CSAD_169	seq_uu
CSAD_170	seq_uv
CSAD_171	seq_uw
CSAD_172	seq_ux
CSAD_173	seq_uy
CSAD_175	seq_uz
CSAD_176	seq_va
CSAD_177	seq_vb
CSAD_178	seq_vc
CSAD_179	seq_vd_550
CSAD_21	seq_qy
CSAD_253	seq_ve
CSAD_254	seq_vf
CSAD_255	seq_vg
CSAD_256	seq_vh
CSAD_258	seq_vi
CSAD_259	seq_vj
CSAD_26	seq_qz
CSAD_260	seq_vk
CSAD_261	seq_vl
CSAD_262	seq_vm
CSAD_263	seq_vn_560
CSAD_264	seq_vo
CSAD_265	seq_vp
CSAD_266	seq_vq
CSAD_267	seq_vr
CSAD_268	seq_vs
CSAD_269	seq_vt
CSAD_270	seq_vu
CSAD_271	seq_vv
CSAD_272	seq_vw
CSAD_273	seq_vx
CSAD_274	seq_vy
CSAD_275	seq_vz
CSAD_276	seq_wa
CSAD_277	seq_wb
CSAD_278	seq_wc
CSAD_3	seq_qn
CSAD_37	seq_ra
CSAD_4	seq_qo
CSAD_47	seq_rb
CSAD_5	seq_qp
CSAD_50	seq_rc
CSAD_51	seq_rd
CSAD_52	seq_re
CSAD_53	seq_rf
CSAD_54	seq_rg
CSAD_55	seq_rh_450
CSAD_56	seq_ri
CSAD_57	seq_rj
CSAD_58	seq_rk
CSAD_59	seq_rl
CSAD_6	seq_qq
CSAD_60	seq_rm
CSAD_61	seq_rn
CSAD_62	seq_ro
CSAD_63	seq_rp
CSAD_64	seq_rq
CSAD_65	seq_rr_460
CSAD_66	seq_rs
CSAD_67	seq_rt
CSAD_68	seq_ru
CSAD_69	seq_rv
CSAD_7	seq_qr
CSAD_70	seq_rw
CSAD_71	seq_rx
CSAD_72	seq_ry
CSAD_73	seq_rz
CSAD_74	seq_sa
CSAD_75	seq_sb
CSAD_76	seq_sc
CSAD_77	seq_sd
CSAD_78	seq_se
CSAD_79	seq_sf
CSAD_8	seq_qs
CSAD_80	seq_sg
CSAD_81	seq_sh
CSAD_82	seq_si
CSAD_83	seq_sj
CSAD_84	seq_sk
CSAD_86	seq_sl_480
CSAD_87	seq_sm
CSAD_88	seq_sn
CSAD_89	seq_so
CSAD_9	seq_qt
CSAD_90	seq_sp
CSAD_91	seq_sq
CSAD_92	seq_sr
CSAD_93	seq_ss
CSAD_94	seq_st
CSAD_95	seq_su
CSAD_96	seq_sv
CSAD_97	seq_sw
CSAD_98	seq_sx
DSP_10	seq_hk
DSP_100	seq_jo
DSP_101	seq_jp_250
DSP_102	seq_jq
DSP_103	seq_jr
DSP_104	seq_js
DSP_105	seq_jt
DSP_106	seq_ju
DSP_107	seq_jv
DSP_108	seq_jw
DSP_109	seq_jx
DSP_11	seq_hl
DSP_110	seq_jy
DSP_111	seq_jz_260
DSP_113	seq_ka
DSP_114	seq_kb
DSP_115	seq_kc
DSP_116	seq_kd
DSP_117	seq_ke
DSP_118	seq_kf
DSP_119	seq_kg
DSP_12	seq_hm
DSP_120	seq_kh
DSP_121	seq_ki
DSP_122	seq_kj
DSP_124	seq_kk
DSP_125	seq_kl
DSP_126	seq_km
DSP_127	seq_kn
DSP_128	seq_ko
DSP_129	seq_kp
DSP_13	seq_hn
DSP_131	seq_kq
DSP_132	seq_kr
DSP_133	seq_ks
DSP_134	seq_kt_280
DSP_135	seq_ku
DSP_136	seq_kv
DSP_137	seq_kw
DSP_138	seq_kx
DSP_139	seq_ky
DSP_14	seq_ho
DSP_140	seq_kz
DSP_141	seq_la
DSP_142	seq_lb
DSP_143	seq_lc
DSP_144	seq_ld
DSP_145	seq_le
DSP_146	seq_lf
DSP_147	seq_lg
DSP_148	seq_lh
DSP_15	seq_hp
DSP_150	seq_li
DSP_151	seq_lj
DSP_152	seq_lk
DSP_153	seq_ll
DSP_154	seq_lm
DSP_155	seq_ln_300
DSP_156	seq_lo
DSP_157	seq_lp
DSP_158	seq_lq
DSP_159	seq_lr
DSP_16	seq_hq
DSP_160	seq_ls
DSP_161	seq_lt
DSP_162	seq_lu
DSP_163	seq_lv
DSP_164	seq_lw
DSP_165	seq_lx
DSP_166	seq_ly
DSP_167	seq_lz
DSP_168	seq_ma
DSP_169	seq_mb
DSP_17	seq_hr_200
DSP_171	seq_mc
DSP_172	seq_md
DSP_173	seq_me
DSP_174	seq_mf
DSP_175	seq_mg
DSP_176	seq_mh_320
DSP_177	seq_mi
DSP_178	seq_mj
DSP_179	seq_mk
DSP_18	seq_hs
DSP_180	seq_ml
DSP_181	seq_mm
DSP_182	seq_mn
DSP_183	seq_mo
DSP_186	seq_mp
DSP_187	seq_mq
DSP_188	seq_mr
DSP_19	seq_ht
DSP_191	seq_ms
DSP_192	seq_mt
DSP_193	seq_mu
DSP_194	seq_mv
DSP_196	seq_mw
DSP_197	seq_mx
DSP_198	seq_my
DSP_199	seq_mz
DSP_2	seq_hd
DSP_20	seq_hu
DSP_200	seq_na
DSP_201	seq_nb_340
DSP_202	seq_nc
DSP_204	seq_nd
DSP_205	seq_ne
DSP_206	seq_nf
DSP_208	seq_ng
DSP_209	seq_nh
DSP_210	seq_ni
DSP_211	seq_nj
DSP_213	seq_nk
DSP_214	seq_nl_350
DSP_215	seq_nm
DSP_217	seq_nn
DSP_218	seq_no
DSP_22	seq_hv
DSP_220	seq_np
DSP_221	seq_nq
DSP_222	seq_nr
DSP_223	seq_ns
DSP_225	seq_nt
DSP_226	seq_nu
DSP_228	seq_nv_360
DSP_23	seq_hw
DSP_231	seq_nw
DSP_233	seq_nx
DSP_234	seq_ny
DSP_235	seq_nz
DSP_236	seq_oa
DSP_237	seq_ob
DSP_238	seq_oc
DSP_239	seq_od
DSP_24	seq_hx
DSP_240	seq_oe
DSP_241	seq_of
DSP_243	seq_og
DSP_244	seq_oh
DSP_245	seq_oi
DSP_246	seq_oj
DSP_247	seq_ok
DSP_249	seq_ol
DSP_25	seq_hy
DSP_251	seq_om
DSP_252	seq_on
DSP_254	seq_oo
DSP_257	seq_op_380
DSP_260	seq_oq
DSP_28	seq_hz
DSP_31	seq_ia
DSP_351	seq_or
DSP_352	seq_os
DSP_353	seq_ot
DSP_354	seq_ou
DSP_355	seq_ov
DSP_356	seq_ow
DSP_357	seq_ox
DSP_358	seq_oy
DSP_359	seq_oz
DSP_360	seq_pa
DSP_361	seq_pb
DSP_362	seq_pc
DSP_363	seq_pd
DSP_364	seq_pe
DSP_365	seq_pf
DSP_366	seq_pg
DSP_367	seq_ph
DSP_368	seq_pi
DSP_369	seq_pj_400
DSP_37	seq_ib
DSP_370	seq_pk
DSP_371	seq_pl
DSP_372	seq_pm
DSP_373	seq_pn
DSP_374	seq_po
DSP_375	seq_pp
DSP_376	seq_pq
DSP_377	seq_pr
DSP_378	seq_ps
DSP_379	seq_pt
DSP_381	seq_pu
DSP_382	seq_pv
DSP_383	seq_pw
DSP_384	seq_px
DSP_385	seq_py
DSP_386	seq_pz
DSP_387	seq_qa
DSP_388	seq_qb
DSP_389	seq_qc
DSP_390	seq_qd_420
DSP_391	seq_qe
DSP_392	seq_qf
DSP_393	seq_qg
DSP_394	seq_qh
DSP_395	seq_qi
DSP_396	seq_qj
DSP_397	seq_qk
DSP_398	seq_ql
DSP_4	seq_he
DSP_400	seq_qm
DSP_5	seq_hf
DSP_53	seq_ic
DSP_54	seq_id
DSP_56	seq_ie
DSP_57	seq_if
DSP_59	seq_ig
DSP_6	seq_hg
DSP_64	seq_ih
DSP_65	seq_ii
DSP_66	seq_ij
DSP_67	seq_ik
DSP_68	seq_il_220
DSP_69	seq_im
DSP_7	seq_hh
DSP_70	seq_in
DSP_72	seq_io
DSP_73	seq_ip
DSP_74	seq_iq
DSP_75	seq_ir
DSP_76	seq_is
DSP_77	seq_it
DSP_78	seq_iu
DSP_79	seq_iv
DSP_8	seq_hi
DSP_80	seq_iw
DSP_82	seq_ix
DSP_83	seq_iy
DSP_84	seq_iz
DSP_85	seq_ja
DSP_86	seq_jb
DSP_87	seq_jc
DSP_89	seq_jd
DSP_9	seq_hj
DSP_90	seq_je
DSP_91	seq_jf_240
DSP_92	seq_jg
DSP_93	seq_jh
DSP_94	seq_ji
DSP_95	seq_jj
DSP_96	seq_jk
DSP_97	seq_jl
DSP_98	seq_jm
DSP_99	seq_jn
EMP_10	seq_cp
EMP_101	seq_fj_140
EMP_102	seq_fk
EMP_104	seq_fl
EMP_105	seq_fm
EMP_106	seq_fn
EMP_107	seq_fo
EMP_109	seq_fp
EMP_11	seq_cq
EMP_110	seq_fq
EMP_111	seq_fr
EMP_112	seq_fs
EMP_113	seq_ft_150
EMP_114	seq_fu
EMP_115	seq_fv
EMP_116	seq_fw
EMP_117	seq_fx
EMP_118	seq_fy
EMP_12	seq_cr
EMP_120	seq_fz
EMP_123	seq_ga
EMP_125	seq_gb
EMP_126	seq_gc
EMP_129	seq_gd_160
EMP_130	seq_ge
EMP_14	seq_cs
EMP_164	seq_gf
EMP_165	seq_gg
EMP_166	seq_gh
EMP_167	seq_gi
EMP_168	seq_gj
EMP_169	seq_gk
EMP_170	seq_gl
EMP_171	seq_gm
EMP_172	seq_gn
EMP_173	seq_go
EMP_174	seq_gp
EMP_175	seq_gq
EMP_176	seq_gr
EMP_177	seq_gs
EMP_178	seq_gt
EMP_179	seq_gu
EMP_180	seq_gv
EMP_181	seq_gw
EMP_182	seq_gx_180
EMP_183	seq_gy
EMP_2	seq_ch_60
EMP_20	seq_ct
EMP_23	seq_cu
EMP_24	seq_cv
EMP_25	seq_cw
EMP_27	seq_cx
EMP_28	seq_cy
EMP_29	seq_cz
EMP_3	seq_ci
EMP_30	seq_da
EMP_31	seq_db_80
EMP_32	seq_dc
EMP_33	seq_dd
EMP_34	seq_de
EMP_35	seq_df
EMP_36	seq_dg
EMP_37	seq_dh
EMP_38	seq_di
EMP_39	seq_dj
EMP_4	seq_cj
EMP_40	seq_dk
EMP_41	seq_dl
EMP_42	seq_dm
EMP_43	seq_dn
EMP_44	seq_do
EMP_45	seq_dp
EMP_46	seq_dq
EMP_47	seq_dr
EMP_48	seq_ds
EMP_49	seq_dt
EMP_5	seq_ck
EMP_50	seq_du
EMP_52	seq_dv_100
EMP_53	seq_dw
EMP_54	seq_dx
EMP_55	seq_dy
EMP_56	seq_dz
EMP_57	seq_ea
EMP_58	seq_eb
EMP_6	seq_cl
EMP_60	seq_ec
EMP_62	seq_ed
EMP_63	seq_ee
EMP_64	seq_ef
EMP_65	seq_eg
EMP_66	seq_eh
EMP_67	seq_ei
EMP_68	seq_ej
EMP_69	seq_ek
EMP_7	seq_cm
EMP_70	seq_el
EMP_72	seq_em
EMP_73	seq_en
EMP_74	seq_eo
EMP_75	seq_ep_120
EMP_76	seq_eq
EMP_77	seq_er
EMP_78	seq_es
EMP_79	seq_et
EMP_8	seq_cn
EMP_80	seq_eu
EMP_81	seq_ev
EMP_82	seq_ew
EMP_83	seq_ex
EMP_84	seq_ey
EMP_85	seq_ez
EMP_86	seq_fa
EMP_87	seq_fb
EMP_89	seq_fc
EMP_9	seq_co
EMP_93	seq_fd
EMP_94	seq_fe
EMP_95	seq_ff
EMP_96	seq_fg
EMP_97	seq_fh
EMP_99	seq_fi
FNP_10	seq_hb
FNP_2	seq_gz
FNP_41	seq_hc
FNP_9	seq_ha

## Sheet: Clusters_Contigs_1_50
Genomes	species	genus	family
uncultured phage MedDCM-OCT-S12-C102 (GU943044)	2	1	1
uncultured Mediterranean phage uvDeep-CGR0-KM14-C182 (KT997826)	3	2	2
uncultured Mediterranean phage uvDeep-CGR2-KM21-C338 (KT997863)	5	4	2
uncultured Mediterranean phage uvDeep-CGR2-KM24-C26 (KT997867)	6	5	3
uncultured Mediterranean phage uvDeep-CGR2-AD7-C12 (KT997871)	7	6	4
uncultured virus (KY052801)	9	8	5
uncultured virus (KY052807)	10	9	6
Pseudomonas phage phi-2 (NC_013638)	20	19	7
Klebsiella phage KP34 (NC_013649)	21	20	7
Synechococcus virus P60 (NC_003390)	16	15	8
Cyanophage PSS2 (NC_013021)	19	18	8
Synechococcus phage S-CBS2 (NC_015463)	22	21	8
Synechococcus phage S-CBS3 (NC_015465)	23	22	9
Synechococcus phage S-CBS1 (NC_016164)	24	22	9
Cyanophage KBS-S-2A (NC_020854)	28	26	9
Prochlorococcus phage MED4-184 (NC_020847)	30	27	10
Cyanophage MED4-117 (NC_020857)	30	27	10
Halovirus HCTV-1 (NC_021330)	32	28	11
uncultured phage MedDCM-OCT-S04-C1035 (GU943013)	1	24	12
uncultured Mediterranean phage uvDeep-CGR1-KM17-C101 (KT997842)	4	3	12
Indivirus ILV1 (KY684089)	13	12	12
Klosneuvirus KNV1 (KY684108)	14	13	12
Streptococcus phage M102 (NC_012884)	18	17	12
Pelagibacter phage HTVC010P (NC_020481)	26	24	12
Pelagibacter phage HTVC011P (NC_020482)	27	25	12
Cellulophaga phage phi18:1 (NC_021790)	34	29	12
Cellulophaga phage phi10:1 (NC_021802)	35	30	12
Puniceispirillum phage HMO-2011 (NC_021864)	36	31	13
Rhizobium phage vB_RleM_P10VF (NC_025429)	37	32	14
Shewanella sp. phage 1/40 (NC_025470)	38	33	15
Sulfitobacter phage pCB2047-C (NC_020856)	29	35	16
Sulfitobacter phage pCB2047-A (NC_020858)	31	35	16
Sulfitobacter phage NYA-2014a (NC_027299)	40	35	16
Synechococcus virus S-ESS1 (KY249644)	12	11	17
Caulobacter phage CcrColossus (NC_019406)	25	23	17
Paracoccus phage vB_PmaS-R3 (NC_026608)	39	34	17
Gordonia phage Attis (NC_041883)	44	38	17
Dinoroseobacter phage vB_DshS-R5C (NC_041921)	45	39	17
Microviridae Fen2266_11 (NC_027639)	41	36	18
seq_as	56	48	18
seq_bo	81	69	18
Synechococcus phage S-IOM18 (NC_021536)	33	37	19
Cyanophage S-RIM32 (NC_031235)	42	37	19
Synechococcus phage S-CAM4 (NC_031900)	43	37	19
seq_bx_50	91	79	19
uncultured virus (KY052796)	8	7	20
uncultured virus (KY052834)	11	10	20
Staphylococcus phage PVL (NC_002321)	15	14	20
Bacillus virus AP50 (NC_011523)	17	16	20
seq_aa_1	46	40	20
seq_aj	47	41	20
seq_ak	48	42	20
seq_al	49	43	20
seq_am	50	44	20
seq_an	51	45	20
seq_ao	52	65	20
seq_ap	53	46	20
seq_aq	54	58	20
seq_ar	55	47	20
seq_ab	57	49	20
seq_at_20	58	50	20
seq_au	59	51	20
seq_av	60	52	20
seq_aw	61	53	20
seq_ax	62	54	20
seq_ay	63	55	20
seq_az	64	56	20
seq_ba	65	66	20
seq_bb	66	57	20
seq_bc	67	63	20
seq_ac	68	58	20
seq_bd	69	59	20
seq_be	70	60	20
seq_bf	71	83	20
seq_bg	72	63	20
seq_bh	73	61	20
seq_bi	74	62	20
seq_bj	75	63	20
seq_bk	76	64	20
seq_bl	77	65	20
seq_bm	78	66	20
seq_ad	79	67	20
seq_bn_40	80	68	20
seq_bp	82	70	20
seq_bq	83	71	20
seq_br	84	72	20
seq_bs	85	73	20
seq_bt	86	74	20
seq_bu	87	75	20
seq_bv	88	76	20
seq_bw	89	77	20
seq_ae	90	78	20
seq_af	92	80	20
seq_ag	93	81	20
seq_ah	94	82	20
seq_ai	95	83	20

## Sheet: Clusters_Contigs_51_100
Genomes	species	genus	family
uncultured Mediterranean phage uvDeep-CGR0-KM14-C182 (KT997826)	3	2	1
uncultured Mediterranean phage uvDeep-CGR2-KM21-C338 (KT997863)	5	4	1
uncultured Mediterranean phage uvDeep-CGR2-KM24-C26 (KT997867)	6	5	2
uncultured Mediterranean phage uvDeep-CGR2-AD7-C12 (KT997871)	7	6	3
uncultured virus (KY052801)	9	8	4
Pseudomonas phage phi-2 (NC_013638)	20	19	5
Klebsiella phage KP34 (NC_013649)	21	20	5
Synechococcus virus P60 (NC_003390)	16	15	6
Cyanophage PSS2 (NC_013021)	19	18	6
Synechococcus phage S-CBS2 (NC_015463)	22	21	6
Synechococcus phage S-CBS3 (NC_015465)	23	22	7
Synechococcus phage S-CBS1 (NC_016164)	24	22	7
Cyanophage KBS-S-2A (NC_020854)	28	26	7
Halovirus HCTV-1 (NC_021330)	32	28	8
uncultured phage MedDCM-OCT-S04-C1035 (GU943013)	1	24	9
uncultured Mediterranean phage uvDeep-CGR1-KM17-C101 (KT997842)	4	3	9
Indivirus ILV1 (KY684089)	13	12	9
Klosneuvirus KNV1 (KY684108)	14	13	9
Staphylococcus phage PVL (NC_002321)	15	14	9
Streptococcus phage M102 (NC_012884)	18	17	9
Pelagibacter phage HTVC010P (NC_020481)	26	24	9
Pelagibacter phage HTVC011P (NC_020482)	27	25	9
Cellulophaga phage phi18:1 (NC_021790)	34	29	9
Cellulophaga phage phi10:1 (NC_021802)	35	30	9
Puniceispirillum phage HMO-2011 (NC_021864)	36	31	10
Rhizobium phage vB_RleM_P10VF (NC_025429)	37	32	11
Shewanella sp. phage 1/40 (NC_025470)	38	33	12
Sulfitobacter phage pCB2047-C (NC_020856)	29	35	13
Sulfitobacter phage pCB2047-A (NC_020858)	31	35	13
Sulfitobacter phage NYA-2014a (NC_027299)	40	35	13
Synechococcus virus S-ESS1 (KY249644)	12	11	14
Caulobacter phage CcrColossus (NC_019406)	25	23	14
Paracoccus phage vB_PmaS-R3 (NC_026608)	39	34	14
Gordonia phage Attis (NC_041883)	44	38	14
Dinoroseobacter phage vB_DshS-R5C (NC_041921)	45	39	14
Synechococcus phage S-IOM18 (NC_021536)	33	37	15
Cyanophage S-RIM32 (NC_031235)	42	37	15
Synechococcus phage S-CAM4 (NC_031900)	43	37	15
seq_ch_60	47	48	15
seq_cn	53	48	15
seq_cq	56	48	15
Prochlorococcus phage MED4-184 (NC_020847)	30	27	16
Cyanophage MED4-117 (NC_020857)	30	27	16
Microviridae Fen2266_11 (NC_027639)	41	36	16
seq_bz	57	49	16
seq_cw	63	55	16
uncultured phage MedDCM-OCT-S12-C102 (GU943044)	2	1	17
seq_ci	48	41	17
seq_db_80	69	60	17
uncultured virus (KY052796)	8	7	18
uncultured virus (KY052807)	10	9	18
uncultured virus (KY052834)	11	10	18
Bacillus virus AP50 (NC_011523)	17	16	18
seq_by	46	40	18
seq_cj	49	42	18
seq_ck	50	43	18
seq_cl	51	44	18
seq_cm	52	45	18
seq_co	54	46	18
seq_cp	55	47	18
seq_cr	58	50	18
seq_cs	59	51	18
seq_ct	60	52	18
seq_cu	61	53	18
seq_cv	62	54	18
seq_cx	64	56	18
seq_cy	65	57	18
seq_cz	66	66	18
seq_da	67	58	18
seq_ca	68	59	18
seq_dc	70	61	18
seq_dd	71	62	18
seq_de	72	63	18
seq_df	73	64	18
seq_dg	74	65	18
seq_dh	75	66	18
seq_di	76	67	18
seq_dj	77	68	18
seq_dk	78	69	18
seq_cb	79	70	18
seq_dl	80	71	18
seq_dm	81	72	18
seq_dn	82	73	18
seq_do	83	74	18
seq_dp	84	75	18
seq_dq	85	76	18
seq_dr	86	77	18
seq_ds	87	78	18
seq_dt	88	79	18
seq_du	89	80	18
seq_cc	90	81	18
seq_dv_100	91	82	18
seq_cd	92	83	18
seq_ce	93	84	18
seq_cf	94	85	18
seq_cg	95	86	18

## Sheet: Clusters_Contigs_101_150
Genomes	species	genus	family
uncultured phage MedDCM-OCT-S12-C102 (GU943044)	2	1	1
uncultured Mediterranean phage uvDeep-CGR0-KM14-C182 (KT997826)	3	2	2
uncultured Mediterranean phage uvDeep-CGR2-KM21-C338 (KT997863)	5	4	2
uncultured Mediterranean phage uvDeep-CGR2-KM24-C26 (KT997867)	6	5	3
uncultured Mediterranean phage uvDeep-CGR2-AD7-C12 (KT997871)	7	6	4
uncultured virus (KY052807)	10	9	5
Pseudomonas phage phi-2 (NC_013638)	20	19	6
Klebsiella phage KP34 (NC_013649)	21	20	6
Synechococcus virus P60 (NC_003390)	16	15	7
Cyanophage PSS2 (NC_013021)	19	18	7
Synechococcus phage S-CBS2 (NC_015463)	22	21	7
Synechococcus phage S-CBS3 (NC_015465)	23	22	8
Synechococcus phage S-CBS1 (NC_016164)	24	22	8
Cyanophage KBS-S-2A (NC_020854)	28	26	8
Prochlorococcus phage MED4-184 (NC_020847)	30	27	9
Cyanophage MED4-117 (NC_020857)	30	27	9
Halovirus HCTV-1 (NC_021330)	32	28	10
uncultured phage MedDCM-OCT-S04-C1035 (GU943013)	1	24	11
uncultured Mediterranean phage uvDeep-CGR1-KM17-C101 (KT997842)	4	3	11
uncultured virus (KY052801)	9	8	11
Indivirus ILV1 (KY684089)	13	12	11
Klosneuvirus KNV1 (KY684108)	14	13	11
Staphylococcus phage PVL (NC_002321)	15	14	11
Bacillus virus AP50 (NC_011523)	17	16	11
Streptococcus phage M102 (NC_012884)	18	17	11
Pelagibacter phage HTVC010P (NC_020481)	26	24	11
Pelagibacter phage HTVC011P (NC_020482)	27	25	11
Cellulophaga phage phi18:1 (NC_021790)	34	29	11
Cellulophaga phage phi10:1 (NC_021802)	35	30	11
Puniceispirillum phage HMO-2011 (NC_021864)	36	31	12
Rhizobium phage vB_RleM_P10VF (NC_025429)	37	32	13
Shewanella sp. phage 1/40 (NC_025470)	38	33	14
Sulfitobacter phage pCB2047-C (NC_020856)	29	35	15
Sulfitobacter phage pCB2047-A (NC_020858)	31	35	15
Sulfitobacter phage NYA-2014a (NC_027299)	40	35	15
Synechococcus phage S-IOM18 (NC_021536)	33	37	16
Cyanophage S-RIM32 (NC_031235)	42	37	16
Synechococcus phage S-CAM4 (NC_031900)	43	37	16
Synechococcus virus S-ESS1 (KY249644)	12	11	17
Caulobacter phage CcrColossus (NC_019406)	25	23	17
Paracoccus phage vB_PmaS-R3 (NC_026608)	39	34	17
Gordonia phage Attis (NC_041883)	44	38	17
Dinoroseobacter phage vB_DshS-R5C (NC_041921)	45	39	17
uncultured virus (KY052796)	8	7	18
uncultured virus (KY052834)	11	10	18
Microviridae Fen2266_11 (NC_027639)	41	36	18
seq_dw	46	40	18
seq_ef	47	41	18
seq_eg	48	42	18
seq_eh	49	43	18
seq_ei	50	44	18
seq_ej	51	79	18
seq_ek	52	45	18
seq_el	53	46	18
seq_em	54	47	18
seq_en	55	64	18
seq_eo	56	48	18
seq_dx	57	82	18
seq_ep_120	58	49	18
seq_eq	59	65	18
seq_er	60	50	18
seq_es	61	51	18
seq_et	62	81	18
seq_eu	63	52	18
seq_ev	64	53	18
seq_ew	65	54	18
seq_ex	66	55	18
seq_ey	67	56	18
seq_dy	68	57	18
seq_ez	69	58	18
seq_fa	70	59	18
seq_fb	71	60	18
seq_fc	72	71	18
seq_fd	73	61	18
seq_fe	74	62	18
seq_ff	75	63	18
seq_fg	76	64	18
seq_fh	77	65	18
seq_fi	78	66	18
seq_dz	79	67	18
seq_fj_140	80	68	18
seq_fk	81	69	18
seq_fl	82	70	18
seq_fm	83	71	18
seq_fn	84	72	18
seq_fo	85	73	18
seq_fp	86	74	18
seq_fq	87	75	18
seq_fr	88	76	18
seq_fs	89	77	18
seq_ea	90	78	18
seq_ft_150	91	79	18
seq_eb	92	80	18
seq_ec	93	81	18
seq_ed	94	82	18
seq_ee	95	83	18

## Sheet: Clusters_Contigs151_200
Genomes	species	genus	family
uncultured Mediterranean phage uvDeep-CGR0-KM14-C182 (KT997826)	3	2	1
uncultured Mediterranean phage uvDeep-CGR2-KM21-C338 (KT997863)	5	4	1
uncultured Mediterranean phage uvDeep-CGR2-KM24-C26 (KT997867)	6	5	2
uncultured Mediterranean phage uvDeep-CGR2-AD7-C12 (KT997871)	7	6	3
Pseudomonas phage phi-2 (NC_013638)	20	19	4
Klebsiella phage KP34 (NC_013649)	21	20	4
Synechococcus virus P60 (NC_003390)	16	15	5
Cyanophage PSS2 (NC_013021)	19	18	5
Synechococcus phage S-CBS2 (NC_015463)	22	21	5
Synechococcus phage S-CBS3 (NC_015465)	23	22	6
Synechococcus phage S-CBS1 (NC_016164)	24	22	6
Cyanophage KBS-S-2A (NC_020854)	28	26	6
Prochlorococcus phage MED4-184 (NC_020847)	30	27	7
Cyanophage MED4-117 (NC_020857)	30	27	7
Halovirus HCTV-1 (NC_021330)	32	28	8
Rhizobium phage vB_RleM_P10VF (NC_025429)	37	32	9
Shewanella sp. phage 1/40 (NC_025470)	38	33	10
Sulfitobacter phage pCB2047-C (NC_020856)	29	35	11
Sulfitobacter phage pCB2047-A (NC_020858)	31	35	11
Sulfitobacter phage NYA-2014a (NC_027299)	40	35	11
Synechococcus phage S-IOM18 (NC_021536)	33	37	12
Cyanophage S-RIM32 (NC_031235)	42	37	12
Synechococcus phage S-CAM4 (NC_031900)	43	37	12
Synechococcus virus S-ESS1 (KY249644)	12	11	13
Caulobacter phage CcrColossus (NC_019406)	25	23	13
Paracoccus phage vB_PmaS-R3 (NC_026608)	39	34	13
Gordonia phage Attis (NC_041883)	44	38	13
Dinoroseobacter phage vB_DshS-R5C (NC_041921)	45	39	13
Puniceispirillum phage HMO-2011 (NC_021864)	36	31	14
seq_gt	64	58	14
uncultured phage MedDCM-OCT-S12-C102 (GU943044)	2	1	15
seq_gm	56	50	15
seq_hb	73	65	15
uncultured virus (KY052801)	9	8	16
uncultured virus (KY052807)	10	9	16
seq_he	76	68	16
seq_gz	71	79	17
seq_hf	77	79	17
seq_fy	90	79	17
seq_gu	65	59	18
seq_ha	72	64	18
seq_hk	83	80	18
seq_hr_200	91	80	18
uncultured phage MedDCM-OCT-S04-C1035 (GU943013)	1	24	19
uncultured Mediterranean phage uvDeep-CGR1-KM17-C101 (KT997842)	4	3	19
uncultured virus (KY052796)	8	7	19
uncultured virus (KY052834)	11	10	19
Indivirus ILV1 (KY684089)	13	12	19
Klosneuvirus KNV1 (KY684108)	14	13	19
Staphylococcus phage PVL (NC_002321)	15	14	19
Bacillus virus AP50 (NC_011523)	17	16	19
Streptococcus phage M102 (NC_012884)	18	17	19
Pelagibacter phage HTVC010P (NC_020481)	26	24	19
Pelagibacter phage HTVC011P (NC_020482)	27	25	19
Cellulophaga phage phi18:1 (NC_021790)	34	29	19
Cellulophaga phage phi10:1 (NC_021802)	35	30	19
Microviridae Fen2266_11 (NC_027639)	41	36	19
seq_fu	46	40	19
seq_gd_160	47	41	19
seq_ge	48	42	19
seq_gf	49	43	19
seq_gg	50	44	19
seq_gh	51	45	19
seq_gi	52	46	19
seq_gj	53	47	19
seq_gk	54	48	19
seq_gl	55	49	19
seq_fv	57	51	19
seq_gn	58	52	19
seq_go	59	53	19
seq_gp	60	54	19
seq_gq	61	55	19
seq_gr	62	56	19
seq_gs	63	57	19
seq_gv	66	60	19
seq_gw	67	61	19
seq_fw	68	77	19
seq_gx_180	69	62	19
seq_gy	70	63	19
seq_hc	74	66	19
seq_hd	75	67	19
seq_hg	78	77	19
seq_fx	79	69	19
seq_hh	80	70	19
seq_hi	81	71	19
seq_hj	82	72	19
seq_hl	84	73	19
seq_hm	85	74	19
seq_hn	86	75	19
seq_ho	87	76	19
seq_hp	88	77	19
seq_hq	89	78	19
seq_fz	92	81	19
seq_ga	93	82	19
seq_gb	94	83	19
seq_gc	95	84	19

## Sheet: Clusters_Contigs_201_250
Genomes	species	genus	family
uncultured phage MedDCM-OCT-S12-C102 (GU943044)	2	1	1
uncultured Mediterranean phage uvDeep-CGR0-KM14-C182 (KT997826)	3	2	2
uncultured Mediterranean phage uvDeep-CGR2-KM21-C338 (KT997863)	5	4	2
uncultured Mediterranean phage uvDeep-CGR2-KM24-C26 (KT997867)	6	5	3
uncultured Mediterranean phage uvDeep-CGR2-AD7-C12 (KT997871)	7	6	4
uncultured virus (KY052807)	10	9	5
Pseudomonas phage phi-2 (NC_013638)	20	19	6
Klebsiella phage KP34 (NC_013649)	21	20	6
Synechococcus virus P60 (NC_003390)	16	15	7
Cyanophage PSS2 (NC_013021)	19	18	7
Synechococcus phage S-CBS2 (NC_015463)	22	21	7
Synechococcus phage S-CBS3 (NC_015465)	23	22	8
Synechococcus phage S-CBS1 (NC_016164)	24	22	8
Cyanophage KBS-S-2A (NC_020854)	28	26	8
Prochlorococcus phage MED4-184 (NC_020847)	30	27	9
Cyanophage MED4-117 (NC_020857)	30	27	9
Halovirus HCTV-1 (NC_021330)	32	28	10
Rhizobium phage vB_RleM_P10VF (NC_025429)	37	32	11
Shewanella sp. phage 1/40 (NC_025470)	38	33	12
Sulfitobacter phage pCB2047-C (NC_020856)	29	35	13
Sulfitobacter phage pCB2047-A (NC_020858)	31	35	13
Sulfitobacter phage NYA-2014a (NC_027299)	40	35	13
Synechococcus phage S-IOM18 (NC_021536)	33	37	14
Cyanophage S-RIM32 (NC_031235)	42	37	14
Synechococcus phage S-CAM4 (NC_031900)	43	37	14
Synechococcus virus S-ESS1 (KY249644)	12	11	15
Caulobacter phage CcrColossus (NC_019406)	25	23	15
Paracoccus phage vB_PmaS-R3 (NC_026608)	39	34	15
Gordonia phage Attis (NC_041883)	44	38	15
Dinoroseobacter phage vB_DshS-R5C (NC_041921)	45	39	15
Puniceispirillum phage HMO-2011 (NC_021864)	36	31	16
seq_in	60	53	16
seq_jd	77	67	16
uncultured phage MedDCM-OCT-S04-C1035 (GU943013)	1	24	17
uncultured Mediterranean phage uvDeep-CGR1-KM17-C101 (KT997842)	4	3	17
uncultured virus (KY052796)	8	7	17
uncultured virus (KY052801)	9	8	17
uncultured virus (KY052834)	11	10	17
Indivirus ILV1 (KY684089)	13	12	17
Klosneuvirus KNV1 (KY684108)	14	13	17
Staphylococcus phage PVL (NC_002321)	15	14	17
Bacillus virus AP50 (NC_011523)	17	16	17
Streptococcus phage M102 (NC_012884)	18	17	17
Pelagibacter phage HTVC010P (NC_020481)	26	24	17
Pelagibacter phage HTVC011P (NC_020482)	27	25	17
Cellulophaga phage phi18:1 (NC_021790)	34	29	17
Cellulophaga phage phi10:1 (NC_021802)	35	30	17
Microviridae Fen2266_11 (NC_027639)	41	36	17
seq_hs	46	40	17
seq_ib	47	41	17
seq_ic	48	42	17
seq_id	49	43	17
seq_ie	50	44	17
seq_if	51	45	17
seq_ig	52	46	17
seq_ih	53	47	17
seq_ii	54	48	17
seq_ij	55	49	17
seq_ik	56	50	17
seq_ht	57	59	17
seq_il_220	58	51	17
seq_im	59	52	17
seq_io	61	54	17
seq_ip	62	72	17
seq_iq	63	55	17
seq_ir	64	78	17
seq_is	65	56	17
seq_it	66	57	17
seq_iu	67	58	17
seq_hu	68	59	17
seq_iv	69	60	17
seq_iw	70	61	17
seq_ix	71	78	17
seq_iy	72	62	17
seq_iz	73	63	17
seq_ja	74	64	17
seq_jb	75	65	17
seq_jc	76	66	17
seq_je	78	68	17
seq_hv	79	69	17
seq_jf_240	80	70	17
seq_jg	81	71	17
seq_jh	82	72	17
seq_ji	83	73	17
seq_jj	84	74	17
seq_jk	85	75	17
seq_jl	86	76	17
seq_jm	87	77	17
seq_jn	88	78	17
seq_jo	89	79	17
seq_hw	90	80	17
seq_jp_250	91	81	17
seq_hx	92	82	17
seq_hy	93	83	17
seq_hz	94	84	17
seq_ia	95	85	17

## Sheet: Clusters_Contigs_251_300
Genomes	species	genus	family
uncultured phage MedDCM-OCT-S12-C102 (GU943044)	2	1	1
uncultured Mediterranean phage uvDeep-CGR0-KM14-C182 (KT997826)	3	2	2
uncultured Mediterranean phage uvDeep-CGR2-KM21-C338 (KT997863)	5	4	2
uncultured Mediterranean phage uvDeep-CGR2-KM24-C26 (KT997867)	6	5	3
uncultured Mediterranean phage uvDeep-CGR2-AD7-C12 (KT997871)	7	6	4
uncultured virus (KY052801)	9	8	5
uncultured virus (KY052807)	10	9	6
Pseudomonas phage phi-2 (NC_013638)	20	19	7
Klebsiella phage KP34 (NC_013649)	21	20	7
Synechococcus virus P60 (NC_003390)	16	15	8
Cyanophage PSS2 (NC_013021)	19	18	8
Synechococcus phage S-CBS2 (NC_015463)	22	21	8
Synechococcus phage S-CBS3 (NC_015465)	23	22	9
Synechococcus phage S-CBS1 (NC_016164)	24	22	9
Cyanophage KBS-S-2A (NC_020854)	28	26	9
Prochlorococcus phage MED4-184 (NC_020847)	30	27	10
Cyanophage MED4-117 (NC_020857)	30	27	10
Halovirus HCTV-1 (NC_021330)	32	28	11
Puniceispirillum phage HMO-2011 (NC_021864)	36	31	12
Rhizobium phage vB_RleM_P10VF (NC_025429)	37	32	13
Shewanella sp. phage 1/40 (NC_025470)	38	33	14
Sulfitobacter phage pCB2047-C (NC_020856)	29	35	15
Sulfitobacter phage pCB2047-A (NC_020858)	31	35	15
Sulfitobacter phage NYA-2014a (NC_027299)	40	35	15
Synechococcus phage S-IOM18 (NC_021536)	33	37	16
Cyanophage S-RIM32 (NC_031235)	42	37	16
Synechococcus phage S-CAM4 (NC_031900)	43	37	16
Synechococcus virus S-ESS1 (KY249644)	12	11	17
Caulobacter phage CcrColossus (NC_019406)	25	23	17
Paracoccus phage vB_PmaS-R3 (NC_026608)	39	34	17
Gordonia phage Attis (NC_041883)	44	38	17
Dinoroseobacter phage vB_DshS-R5C (NC_041921)	45	39	17
seq_kn	62	54	18
uncultured phage MedDCM-OCT-S04-C1035 (GU943013)	1	24	19
uncultured Mediterranean phage uvDeep-CGR1-KM17-C101 (KT997842)	4	3	19
uncultured virus (KY052796)	8	7	19
uncultured virus (KY052834)	11	10	19
Indivirus ILV1 (KY684089)	13	12	19
Klosneuvirus KNV1 (KY684108)	14	13	19
Staphylococcus phage PVL (NC_002321)	15	14	19
Bacillus virus AP50 (NC_011523)	17	16	19
Streptococcus phage M102 (NC_012884)	18	17	19
Pelagibacter phage HTVC010P (NC_020481)	26	24	19
Pelagibacter phage HTVC011P (NC_020482)	27	25	19
Cellulophaga phage phi18:1 (NC_021790)	34	29	19
Cellulophaga phage phi10:1 (NC_021802)	35	30	19
Microviridae Fen2266_11 (NC_027639)	41	36	19
seq_jq	46	40	19
seq_jz_260	47	41	19
seq_ka	48	42	19
seq_kb	49	43	19
seq_kc	50	44	19
seq_kd	51	45	19
seq_ke	52	46	19
seq_kf	53	47	19
seq_kg	54	69	19
seq_kh	55	48	19
seq_ki	56	75	19
seq_jr	57	49	19
seq_kj	58	50	19
seq_kk	59	51	19
seq_kl	60	52	19
seq_km	61	53	19
seq_ko	63	66	19
seq_kp	64	80	19
seq_kq	65	69	19
seq_kr	66	55	19
seq_ks	67	56	19
seq_js	68	57	19
seq_kt_280	69	64	19
seq_ku	70	58	19
seq_kv	71	59	19
seq_kw	72	73	19
seq_kx	73	60	19
seq_ky	74	61	19
seq_kz	75	62	19
seq_la	76	63	19
seq_lb	77	64	19
seq_lc	78	65	19
seq_jt	79	66	19
seq_ld	80	67	19
seq_le	81	68	19
seq_lf	82	69	19
seq_lg	83	70	19
seq_lh	84	71	19
seq_li	85	72	19
seq_lj	86	75	19
seq_lk	87	73	19
seq_ll	88	74	19
seq_lm	89	75	19
seq_ju	90	76	19
seq_ln_300	91	77	19
seq_jv	92	78	19
seq_jw	93	79	19
seq_jx	94	80	19
seq_jy	95	81	19

## Sheet: Clusters_Contigs_301_350
Genomes	species	genus	family
uncultured phage MedDCM-OCT-S12-C102 (GU943044)	2	1	1
uncultured Mediterranean phage uvDeep-CGR0-KM14-C182 (KT997826)	3	2	2
uncultured Mediterranean phage uvDeep-CGR2-KM21-C338 (KT997863)	5	4	2
uncultured Mediterranean phage uvDeep-CGR2-KM24-C26 (KT997867)	6	5	3
uncultured virus (KY052807)	10	9	4
Pseudomonas phage phi-2 (NC_013638)	20	19	5
Klebsiella phage KP34 (NC_013649)	21	20	5
Synechococcus virus P60 (NC_003390)	16	15	6
Cyanophage PSS2 (NC_013021)	19	18	6
Synechococcus phage S-CBS2 (NC_015463)	22	21	6
Synechococcus phage S-CBS3 (NC_015465)	23	22	7
Synechococcus phage S-CBS1 (NC_016164)	24	22	7
Cyanophage KBS-S-2A (NC_020854)	28	26	7
Prochlorococcus phage MED4-184 (NC_020847)	30	27	8
Cyanophage MED4-117 (NC_020857)	30	27	8
Halovirus HCTV-1 (NC_021330)	32	28	9
Indivirus ILV1 (KY684089)	13	12	10
Klosneuvirus KNV1 (KY684108)	14	13	10
Cellulophaga phage phi18:1 (NC_021790)	34	29	10
Cellulophaga phage phi10:1 (NC_021802)	35	30	10
Puniceispirillum phage HMO-2011 (NC_021864)	36	31	11
Rhizobium phage vB_RleM_P10VF (NC_025429)	37	32	12
Shewanella sp. phage 1/40 (NC_025470)	38	33	13
Sulfitobacter phage pCB2047-C (NC_020856)	29	35	14
Sulfitobacter phage pCB2047-A (NC_020858)	31	35	14
Sulfitobacter phage NYA-2014a (NC_027299)	40	35	14
Synechococcus phage S-IOM18 (NC_021536)	33	37	15
Cyanophage S-RIM32 (NC_031235)	42	37	15
Synechococcus phage S-CAM4 (NC_031900)	43	37	15
Synechococcus virus S-ESS1 (KY249644)	12	11	16
Caulobacter phage CcrColossus (NC_019406)	25	23	16
Paracoccus phage vB_PmaS-R3 (NC_026608)	39	34	16
Gordonia phage Attis (NC_041883)	44	38	16
Dinoroseobacter phage vB_DshS-R5C (NC_041921)	45	39	16
uncultured virus (KY052834)	11	10	17
Bacillus virus AP50 (NC_011523)	17	16	17
seq_lp	57	49	17
uncultured Mediterranean phage uvDeep-CGR2-AD7-C12 (KT997871)	7	6	18
seq_ls	90	80	18
uncultured phage MedDCM-OCT-S04-C1035 (GU943013)	1	24	19
uncultured Mediterranean phage uvDeep-CGR1-KM17-C101 (KT997842)	4	3	19
uncultured virus (KY052796)	8	7	19
uncultured virus (KY052801)	9	8	19
Staphylococcus phage PVL (NC_002321)	15	14	19
Streptococcus phage M102 (NC_012884)	18	17	19
Pelagibacter phage HTVC010P (NC_020481)	26	24	19
Pelagibacter phage HTVC011P (NC_020482)	27	25	19
Microviridae Fen2266_11 (NC_027639)	41	36	19
seq_lo	46	73	19
seq_lx	47	40	19
seq_ly	48	41	19
seq_lz	49	42	19
seq_ma	50	43	19
seq_mb	51	44	19
seq_mc	52	45	19
seq_md	53	46	19
seq_me	54	50	19
seq_mf	55	47	19
seq_mg	56	48	19
seq_mh_320	58	50	19
seq_mi	59	51	19
seq_mj	60	52	19
seq_mk	61	53	19
seq_ml	62	54	19
seq_mm	63	55	19
seq_mn	64	56	19
seq_mo	65	57	19
seq_mp	66	58	19
seq_mq	67	59	19
seq_lq	68	66	19
seq_mr	69	60	19
seq_ms	70	61	19
seq_mt	71	62	19
seq_mu	72	63	19
seq_mv	73	64	19
seq_mw	74	65	19
seq_mx	75	66	19
seq_my	76	67	19
seq_mz	77	78	19
seq_na	78	68	19
seq_lr	79	69	19
seq_nb_340	80	70	19
seq_nc	81	71	19
seq_nd	82	72	19
seq_ne	83	73	19
seq_nf	84	74	19
seq_ng	85	75	19
seq_nh	86	76	19
seq_ni	87	77	19
seq_nj	88	78	19
seq_nk	89	79	19
seq_nl_350	91	81	19
seq_lt	92	82	19
seq_lu	93	83	19
seq_lv	94	84	19
seq_lw	95	85	19

## Sheet: Clusters_Contigs_351_400
Genomes	species	genus	family
uncultured Mediterranean phage uvDeep-CGR0-KM14-C182 (KT997826)	3	2	1
uncultured Mediterranean phage uvDeep-CGR2-KM21-C338 (KT997863)	5	4	1
uncultured Mediterranean phage uvDeep-CGR2-AD7-C12 (KT997871)	7	6	2
Pseudomonas phage phi-2 (NC_013638)	20	19	3
Klebsiella phage KP34 (NC_013649)	21	20	3
Synechococcus virus P60 (NC_003390)	16	15	4
Cyanophage PSS2 (NC_013021)	19	18	4
Synechococcus phage S-CBS2 (NC_015463)	22	21	4
Synechococcus phage S-CBS3 (NC_015465)	23	22	5
Synechococcus phage S-CBS1 (NC_016164)	24	22	5
Cyanophage KBS-S-2A (NC_020854)	28	26	5
Prochlorococcus phage MED4-184 (NC_020847)	30	27	6
Cyanophage MED4-117 (NC_020857)	30	27	6
Halovirus HCTV-1 (NC_021330)	32	28	7
Puniceispirillum phage HMO-2011 (NC_021864)	36	31	8
Rhizobium phage vB_RleM_P10VF (NC_025429)	37	32	9
Shewanella sp. phage 1/40 (NC_025470)	38	33	10
Sulfitobacter phage pCB2047-C (NC_020856)	29	35	11
Sulfitobacter phage pCB2047-A (NC_020858)	31	35	11
Sulfitobacter phage NYA-2014a (NC_027299)	40	35	11
Synechococcus phage S-IOM18 (NC_021536)	33	37	12
Cyanophage S-RIM32 (NC_031235)	42	37	12
Synechococcus phage S-CAM4 (NC_031900)	43	37	12
Synechococcus virus S-ESS1 (KY249644)	12	11	13
Caulobacter phage CcrColossus (NC_019406)	25	23	13
Paracoccus phage vB_PmaS-R3 (NC_026608)	39	34	13
Gordonia phage Attis (NC_041883)	44	38	13
Dinoroseobacter phage vB_DshS-R5C (NC_041921)	45	39	13
uncultured Mediterranean phage uvDeep-CGR2-KM24-C26 (KT997867)	6	5	14
seq_ov	75	68	14
seq_nv_360	47	41	15
seq_nw	48	42	15
seq_no	68	61	15
seq_ox	77	70	15
uncultured phage MedDCM-OCT-S04-C1035 (GU943013)	1	24	16
uncultured Mediterranean phage uvDeep-CGR1-KM17-C101 (KT997842)	4	3	16
Indivirus ILV1 (KY684089)	13	12	16
Klosneuvirus KNV1 (KY684108)	14	13	16
Staphylococcus phage PVL (NC_002321)	15	14	16
Streptococcus phage M102 (NC_012884)	18	17	16
Pelagibacter phage HTVC010P (NC_020481)	26	24	16
Pelagibacter phage HTVC011P (NC_020482)	27	25	16
Cellulophaga phage phi18:1 (NC_021790)	34	29	16
Cellulophaga phage phi10:1 (NC_021802)	35	30	16
seq_pd	84	76	16
uncultured phage MedDCM-OCT-S12-C102 (GU943044)	2	1	17
seq_pb	82	78	17
seq_pf	86	78	17
uncultured virus (KY052801)	9	8	18
uncultured virus (KY052807)	10	9	18
seq_ph	88	80	18
seq_oq	70	63	19
seq_oz	80	73	19
seq_pi	89	81	19
uncultured virus (KY052796)	8	7	20
uncultured virus (KY052834)	11	10	20
Bacillus virus AP50 (NC_011523)	17	16	20
Microviridae Fen2266_11 (NC_027639)	41	36	20
seq_nm	46	40	20
seq_nx	49	43	20
seq_ny	50	44	20
seq_nz	51	45	20
seq_oa	52	46	20
seq_ob	53	47	20
seq_oc	54	82	20
seq_od	55	48	20
seq_oe	56	49	20
seq_nn	57	50	20
seq_of	58	51	20
seq_og	59	52	20
seq_oh	60	53	20
seq_oi	61	54	20
seq_oj	62	55	20
seq_ok	63	56	20
seq_ol	64	57	20
seq_om	65	58	20
seq_on	66	59	20
seq_oo	67	60	20
seq_op_380	69	62	20
seq_or	71	64	20
seq_os	72	65	20
seq_ot	73	66	20
seq_ou	74	67	20
seq_ow	76	69	20
seq_oy	78	71	20
seq_np	79	72	20
seq_pa	81	74	20
seq_pc	83	75	20
seq_pe	85	77	20
seq_pg	87	79	20
seq_nq	90	82	20
seq_pj_400	91	83	20
seq_nr	92	84	20
seq_ns	93	85	20
seq_nt	94	86	20
seq_nu	95	87	20

## Sheet: Clusters_Contigs_401_450
Genomes	species	genus	family
uncultured phage MedDCM-OCT-S12-C102 (GU943044)	2	1	1
uncultured Mediterranean phage uvDeep-CGR2-KM24-C26 (KT997867)	6	5	2
uncultured Mediterranean phage uvDeep-CGR2-AD7-C12 (KT997871)	7	6	3
uncultured virus (KY052801)	9	8	4
uncultured virus (KY052807)	10	9	5
Pseudomonas phage phi-2 (NC_013638)	20	19	6
Klebsiella phage KP34 (NC_013649)	21	20	6
Synechococcus virus P60 (NC_003390)	16	15	7
Cyanophage PSS2 (NC_013021)	19	18	7
Synechococcus phage S-CBS2 (NC_015463)	22	21	7
Synechococcus phage S-CBS3 (NC_015465)	23	22	8
Synechococcus phage S-CBS1 (NC_016164)	24	22	8
Cyanophage KBS-S-2A (NC_020854)	28	26	8
Halovirus HCTV-1 (NC_021330)	32	28	9
Rhizobium phage vB_RleM_P10VF (NC_025429)	37	32	10
Shewanella sp. phage 1/40 (NC_025470)	38	33	11
Synechococcus virus S-ESS1 (KY249644)	12	11	12
Caulobacter phage CcrColossus (NC_019406)	25	23	12
Paracoccus phage vB_PmaS-R3 (NC_026608)	39	34	12
Gordonia phage Attis (NC_041883)	44	38	12
Dinoroseobacter phage vB_DshS-R5C (NC_041921)	45	39	12
uncultured Mediterranean phage uvDeep-CGR0-KM14-C182 (KT997826)	3	2	13
uncultured Mediterranean phage uvDeep-CGR2-KM21-C338 (KT997863)	5	4	13
seq_qm	67	61	13
Bacillus virus AP50 (NC_011523)	17	16	14
Synechococcus phage S-IOM18 (NC_021536)	33	37	14
Cyanophage S-RIM32 (NC_031235)	42	37	14
Synechococcus phage S-CAM4 (NC_031900)	43	37	14
seq_pw	50	44	14
seq_qo	70	64	14
seq_qp	71	65	14
Sulfitobacter phage pCB2047-C (NC_020856)	29	35	15
Sulfitobacter phage pCB2047-A (NC_020858)	31	35	15
Sulfitobacter phage NYA-2014a (NC_027299)	40	35	15
seq_re	87	81	15
Prochlorococcus phage MED4-184 (NC_020847)	30	27	16
Cyanophage MED4-117 (NC_020857)	30	27	16
Puniceispirillum phage HMO-2011 (NC_021864)	36	31	16
seq_pv	49	43	16
seq_pl	57	51	16
seq_qq	72	66	16
seq_qu	76	70	16
seq_rf	88	82	16
uncultured phage MedDCM-OCT-S04-C1035 (GU943013)	1	24	17
uncultured Mediterranean phage uvDeep-CGR1-KM17-C101 (KT997842)	4	3	17
uncultured virus (KY052796)	8	7	17
uncultured virus (KY052834)	11	10	17
Indivirus ILV1 (KY684089)	13	12	17
Klosneuvirus KNV1 (KY684108)	14	13	17
Staphylococcus phage PVL (NC_002321)	15	14	17
Streptococcus phage M102 (NC_012884)	18	17	17
Pelagibacter phage HTVC010P (NC_020481)	26	24	17
Pelagibacter phage HTVC011P (NC_020482)	27	25	17
Cellulophaga phage phi18:1 (NC_021790)	34	29	17
Cellulophaga phage phi10:1 (NC_021802)	35	30	17
Microviridae Fen2266_11 (NC_027639)	41	36	17
seq_pk	46	40	17
seq_pt	47	41	17
seq_pu	48	42	17
seq_px	51	45	17
seq_py	52	46	17
seq_pz	53	47	17
seq_qa	54	48	17
seq_qb	55	49	17
seq_qc	56	50	17
seq_qd_420	58	52	17
seq_qe	59	53	17
seq_qf	60	54	17
seq_qg	61	55	17
seq_qh	62	56	17
seq_qi	63	57	17
seq_qj	64	58	17
seq_qk	65	59	17
seq_ql	66	60	17
seq_pm	68	62	17
seq_qn	69	63	17
seq_qr	73	67	17
seq_qs	74	68	17
seq_qt	75	69	17
seq_qv	77	71	17
seq_qw	78	72	17
seq_pn	79	73	17
seq_qx_440	80	74	17
seq_qy	81	75	17
seq_qz	82	76	17
seq_ra	83	77	17
seq_rb	84	78	17
seq_rc	85	79	17
seq_rd	86	80	17
seq_rg	89	83	17
seq_po	90	84	17
seq_rh_450	91	85	17
seq_pp	92	86	17
seq_pq	93	87	17
seq_pr	94	88	17
seq_ps	95	89	17

[truncated: 3 more sheets: Clusters_Contigs_451_500, Clusters_Contigs_401_550, Clusters_Contigs_551_575]
